# Supplementary material for: Early Outcome of Multisystem Inflammatory Syndrome in Neonates Diagnosed following Prenatal Maternal COVID-19 Infection: A Three-Case Series
Source: MDPI journal article supplement (doi:10.3390/pediatric15040054), 2023-10-10
Supplement: s1 [file s1]

**Supplementary Table 1.** MIS-N in newborns: review of literature

| Reference                                                  | Similarities                                                                                                                                                                                                                                                                                                   | Differences                                                                                                                                                                                                                    |
|------------------------------------------------------------|----------------------------------------------------------------------------------------------------------------------------------------------------------------------------------------------------------------------------------------------------------------------------------------------------------------|--------------------------------------------------------------------------------------------------------------------------------------------------------------------------------------------------------------------------------|
| Year of publication,<br>country                            |                                                                                                                                                                                                                                                                                                                |                                                                                                                                                                                                                                |
| Number of patients                                         |                                                                                                                                                                                                                                                                                                                |                                                                                                                                                                                                                                |
| [6]<br><br>2021, India<br><br>1 patient                    | An eight-day-old newborn with elevated NT pro BNP and D-dimers levels. Discharged after treatment with corticoids and immunoglobulins, as 1/3 of our patients received.                                                                                                                                        | The patient in the referenced article had a SARS-COV2 positive test and was admitted for signs of cardiac arrest and pulmonary oedema. Presented also with an erythematous rash.                                               |
| [7]<br><br>2021, United States of America<br><br>1 patient | Neonate with positive IgG and negative IgM anti SARS COV2 antibodies.<br><br>High levels of NT pro-BNP, D-dimers and troponin. Treated with intravenous immunoglobulin was initiated. The baby recovered after 8 days of hospitalization with no other cardiac sequelae.                                       | The newborn in the referenced article was admitted with left ventricle dysfunction and coronary artery dilation                                                                                                                |
| [4]<br><br>2021, India<br><br>20 patients                  | Seventeen out of 20 enrolled newborns had positive IgG anti SARS COV2, with high levels of D-dimers, NT pro-BNP.<br><br>They presented bloody stools, like one of our described patients.<br><br>All of them received treatment with cortisone and immunoglobulins. Eighteen of them made a complete recovery. | Twenty Indian neonates presented with cardiac shock, 8 of them with cardiac injury (left ventricular dysfunction, prolonged QT coronary dilatation)<br><br>Two died, unlike our patients who recovered with no known sequelae. |
| [8]<br><br>2021, Saudi Arabia<br><br>2 patients            | Two cases: one with maternal COVID infection in the third trimester, the second with positive RT-PCR test immediately after birth. One newborn had positive anti SARS CoV-2 IgG antibodies.<br><br>Both had high levels of CRP, NT pro                                                                         | Both newborns showed signs of left ventricular dysfunction                                                                                                                                                                     |

|                                   |                                                                                                                                                                                                                                                              |                                                                                                                                                                                                                                    |
|-----------------------------------|--------------------------------------------------------------------------------------------------------------------------------------------------------------------------------------------------------------------------------------------------------------|------------------------------------------------------------------------------------------------------------------------------------------------------------------------------------------------------------------------------------|
|                                   | BNP and CK-MB levels. One received antibiotics, and both of them received corticotherapy and immunoglobulins. Both fully recovered.                                                                                                                          |                                                                                                                                                                                                                                    |
| [9]<br>2021, India<br>1 patient   | An 11-day-old newborn with positive IgG anti SARS COV2 antibodies, with elevated levels of CRP, D-dimers and NT pro-BNP. Treatment with corticosteroids was administered.                                                                                    | The patient had aortic thrombosis of the right lower limb and limb amputation was necessary.                                                                                                                                       |
| [10]<br>2021, India<br>1 patient  | A 24 day-old with positive IgG anti SARS CoV-2 IgG antibodies, elevated inflammatory markers. Antibiotic treatment was administered, along with cortisone and immunoglobulins. Documented maternal exposure to SARS CoV-2 virus.                             | Patient presented with characteristics of cardiogenic shock.                                                                                                                                                                       |
| [11]<br>2021, Brazil<br>1 patient | A newborn of a COVID-19 positive mother who presented with positive anti SARS CoV-2 IgG antibodies. The newborn had elevated D dimers, NT pro-BNP, troponin and inflammatory markers. Treated with antibiotics. Discharged with no known sequelae.           | A premature newborn with positive RT-PCR test both for t newborn and his mother). Echocardiography revealed major fetal pericardial effusion. Post-partum, the child experienced severe respiratory distress pericardial effusion. |
| [12]<br>2022, India<br>3 patients | Known maternal exposure to COVID, both in the first and third trimester.<br><br>Elevated NT pro-BNP, D dimers and troponin levels.<br><br>Positive anti SARS CoV-2 IgG antibodies, negative IgM antibodies. Treated with immunoglobulins and corticotherapy. | Male neonate with severe respiratory distress at birth and cardiac dysfunction.<br><br>Fatal outcome.                                                                                                                              |
| [12]<br>2022, India<br>3 patients | A 6-day-old female with positive anti SARS COV2 IgG antibodies and negative IgM antibodies.<br><br>High levels of D-dimers and T troponin.                                                                                                                   | The patient developed intra cardiac and aortic thrombosis                                                                                                                                                                          |

|                                    |                                                                                                                                                                                                                                                                                                                                         |                                                                                                                         |
|------------------------------------|-----------------------------------------------------------------------------------------------------------------------------------------------------------------------------------------------------------------------------------------------------------------------------------------------------------------------------------------|-------------------------------------------------------------------------------------------------------------------------|
|                                    | Received intravenous immunoglobulin. Discharged in good condition.                                                                                                                                                                                                                                                                      |                                                                                                                         |
| [13]<br>2022, India<br>20 patients | <p>Twenty neonates with positive anti SARS COV2 IgG antibodies and negative IgM antibodies. Ten mothers with known maternal exposure.</p> <p>Ten patients had elevated NT pro-BNP, 10 had high D-dimers levels, and 1 had high levels of troponin. Nineteen received antibiotics, 17 received corticotherapy and 8 immunoglobulins.</p> | <p>Eight newborns had cardiac dysfunction.</p> <p>Two neonates died.</p>                                                |
| [14]<br>2022, India<br>1 patient   | An 8-day-old neonate presented with diarrheic stools. Positive anti SARS CoV-2 IgG antibodies both in child and mother. High levels of D-dimers and NT pro-BNP. Treated with intravenous immunoglobulin and methylprednisolone. Full recovery.                                                                                          | Developed severe respiratory distress.                                                                                  |
| [15]<br>2021, India<br>1 patient   | <p>RT-PCR SARS CoV-2 test negative, positive anti SARS COV2 IgG antibodies, high levels of D-dimers and troponin. Mother had positive IgG anti SARS CoV-2 IgG antibodies.</p> <p>Baby received intravenous immunoglobulin and 14 days of methylprednisolone and made a full recovery.</p>                                               | A premature newborn with severe respiratory distress and cardiogenic shock shortly after delivery (32 weeks gestation). |
| [16]<br>2021, India<br>1 patient   | A ten day-old with high fever, positive anti SARS-CoV-2 IgG antibodies and negative RT-PCR test. Elevated levels of CK-MB and troponin T. Treated with immunoglobulins and cortisone.                                                                                                                                                   |                                                                                                                         |
| [17]<br>2021, India                | 2-day-old patient with known maternal COVID exposure in the first trimester of pregnancy. Positive anti                                                                                                                                                                                                                                 | The patient developed an erythematous rash on face, chest and abdomen, persistent                                       |

|                                     |                                                                                                                                                                                                                                                                                                                                                                                                                                                |                                                                                                                  |
|-------------------------------------|------------------------------------------------------------------------------------------------------------------------------------------------------------------------------------------------------------------------------------------------------------------------------------------------------------------------------------------------------------------------------------------------------------------------------------------------|------------------------------------------------------------------------------------------------------------------|
| 1 patient                           | SARS CoV-2 IgG antibodies for child and mother. Elevated levels of D-dimers and NT pro-BNP. Successfully treated with intravenous immunoglobulin and methylprednisolone. Discharged after 11 hospitalization days.                                                                                                                                                                                                                             | bradycardia and bilious emesis.                                                                                  |
| [18]<br>2022, India<br>2 patients   | Presented with mild respiratory distress), positive anti SARS CoV-2 IgG, positive IgG antibodies in the mother. Elevated levels of NT pro-BNP, D-dimers and troponin T. Successfully discharged after treatment (antibiotics, intravenous immunoglobulin and methylprednisolone).                                                                                                                                                              | Severe thrombocytopenia and modified coagulation profile.                                                        |
| [18]<br>2022, India<br>2 patients   | Four days-old with poor appetite and lethargy with positive anti SARS CoV-2 IgG antibodies in mother and baby.<br><br>Elevated D-dimers levels. Treated with intravenous immunoglobulins and systemic steroids                                                                                                                                                                                                                                 | The patient succumbed due to massive pulmonary hemorrhage.                                                       |
| [19]<br>2022, Thailand<br>1 patient | Fifteen-day-old with negative IgM antibodies and RT-PCR SARS COV2 test; mother and child had anti SARS COV2 IgG antibodies. Known maternal exposure to COVID during second trimester of pregnancy.<br><br>Newborn with elevated NT pro-BNP, troponin and CK-MB levels.<br><br>Successfully discharged after 12 days of treatment (intravenous immunoglobulin, methylprednisolone, antibiotics).<br><br>The twin sibling did not develop MIS-N. | Premature baby (33 weeks of gestation) from a twin pregnancy. Echocardiography showed reduced ejection fraction. |

**Abbreviations**

CK-MB - creatine phosphokinase myocardial band

COVID-19 - coronavirus disease 2019

CRP – C reactive protein

Ig G – immunoglobulin G

Ig M – immunoglobulin M

MIS - multisystem inflammatory syndrome

MIS-N - multisystem Inflammatory syndrome in neonates

NT-pro-BNP - N-terminal pro b-type natriuretic peptide

RT-PCR - reverse transcription polymerase chain reaction

SARS-CoV-2 - severe acute respiratory syndrome coronavirus 2
